# Supplementary material for: Solution behavior and encapsulation properties of fatty acid–elastin-like polypeptide conjugates
Source: Royal Society of Chemistry journal article supplement (doi:10.1039/d2ra06603c), 2023-01-01
Supplement: d2ra06603c1.pdf [file d2ra06603c1.pdf]

## Supplementary Informations

### Solution behavior and encapsulation properties of fatty acid-elastin-like polypeptide conjugates.

Tingting Zhang, Frédéric Peruch, Amélie Weber, Katell Bathany, Martin Fauquignon, Angela Mutschler, Christophe Schatz, Bertrand Garbay

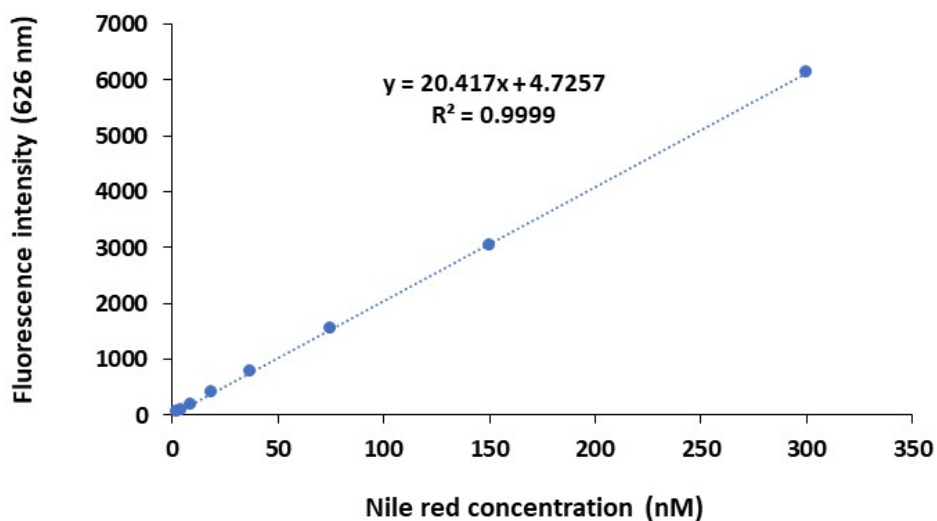

**Figure S1. Calibration curve for determination of the Nile red (NR) concentration in DMSO.** The mean fluorescence intensity of NR at  $\lambda_{em} = 626$  nm ( $\lambda_{ex} = 550$  nm) was determined for serial dilutions of a NR solution at 2  $\mu$ M in DMSO.

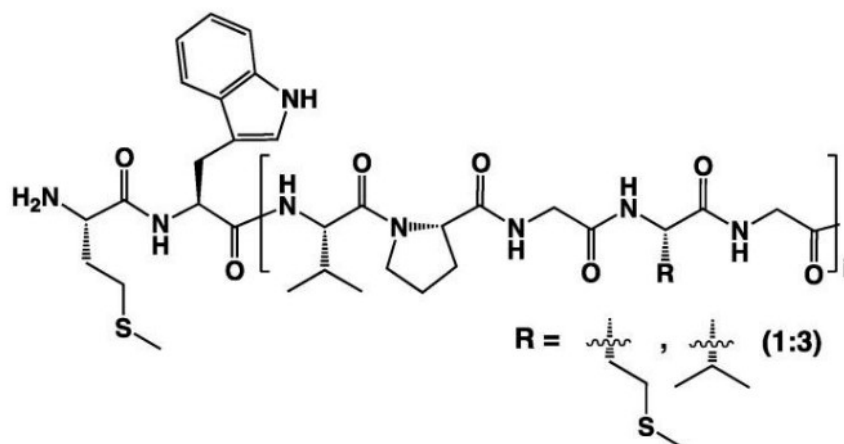

**Figure S2. Chemical structure of the ELP M-series.** The guest amino acid is either a methionine or a valine, with a molar ratio 1:3. The number of pentapeptide repetition (*i*) is 20, 40 and 80.

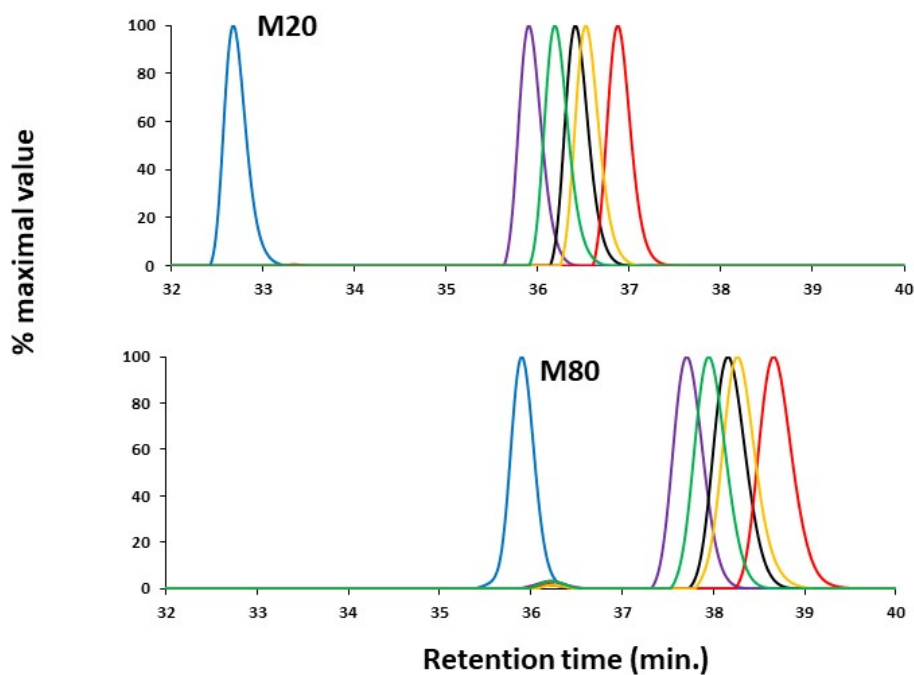

**Figure S3. RP-HPLC chromatograms of M20-FAs and M80-FAs.** ELP-FAs were injected at a concentration of 70  $\mu\text{M}$  in water. The eluent was a gradient of a water/methanol mixture. The absorbance at 230 nm was normalized to the maximal value. Chromatograms of unmodified ELP (blue lines), ELP-C14 (purple lines), ELP-C16 (black lines), ELP-C18 (red lines), ELP-C18:1 (orange lines) and ELP-C18:2 (green lines) are plotted for the M20 and M80 series.

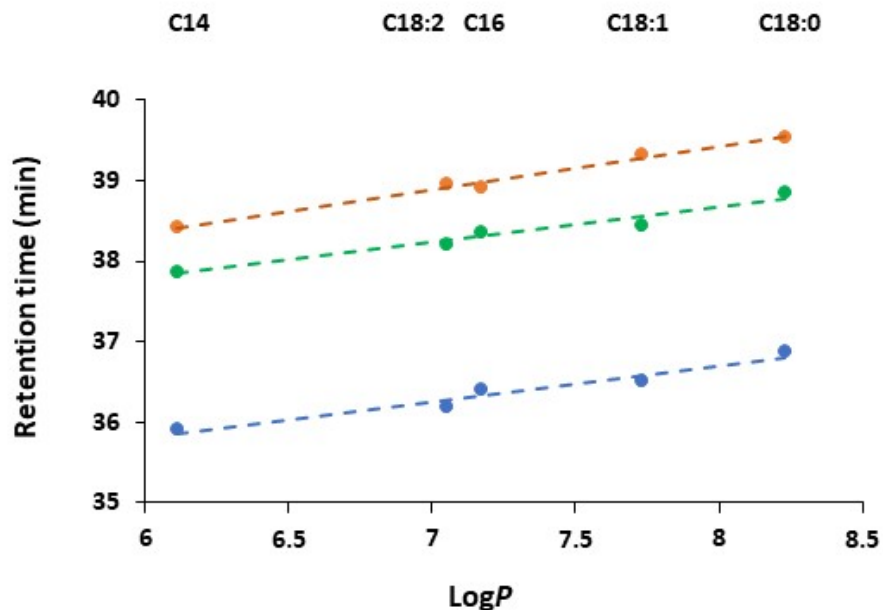

**Figure S4.** Retention times of ELP-FA conjugates measured by RP-HPLC as function of the  $\text{Log}P$  value of the fatty acids. M20-FAs (blue), M40-FAs (green) and M80-FAs (orange).

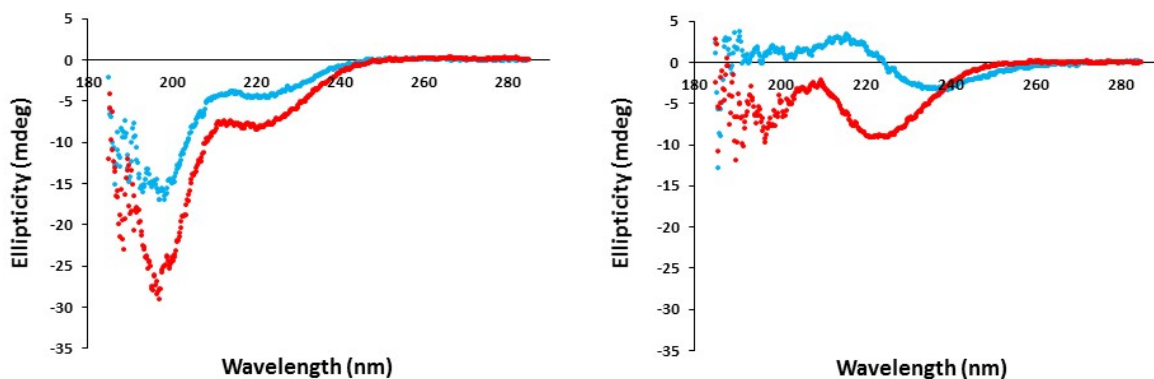

**Figure S5.** Circular dichroism spectra of 10  $\mu\text{M}$  solutions of M80 and M80-C16 in water. The spectra were recorded at 10 °C (left side) and 50 °C (right side). Blue traces correspond to M80, red traces correspond to M80-C16.

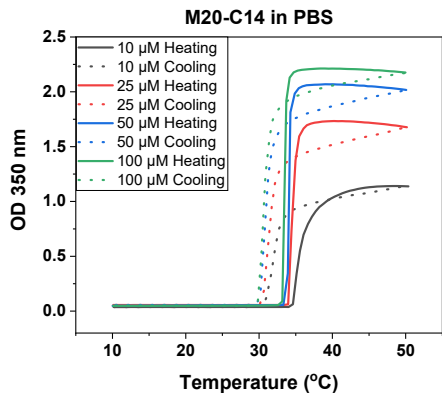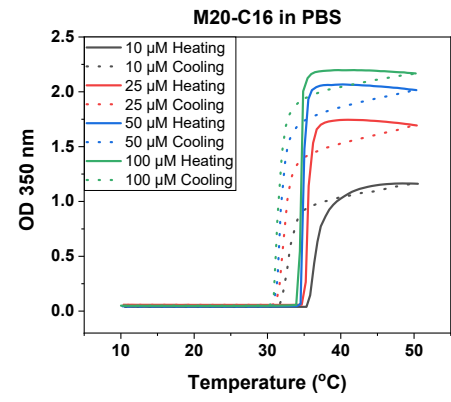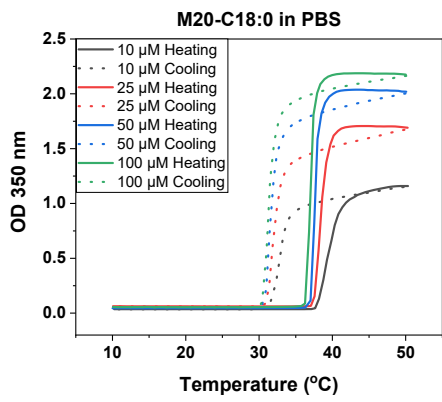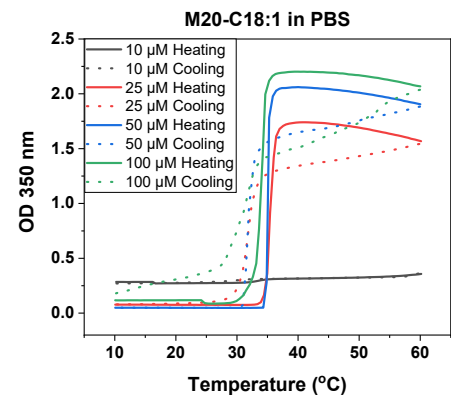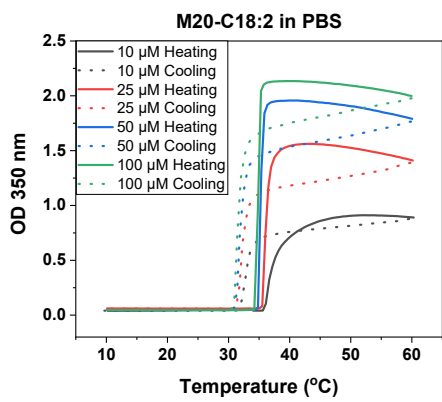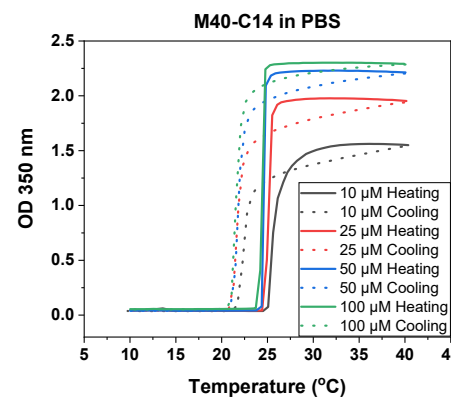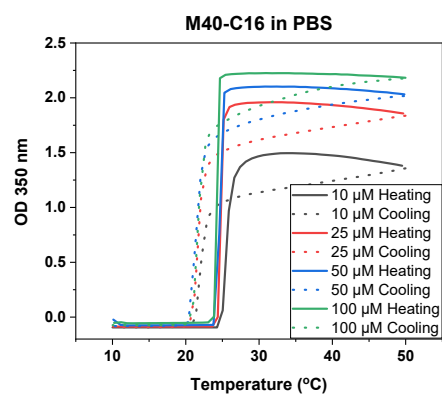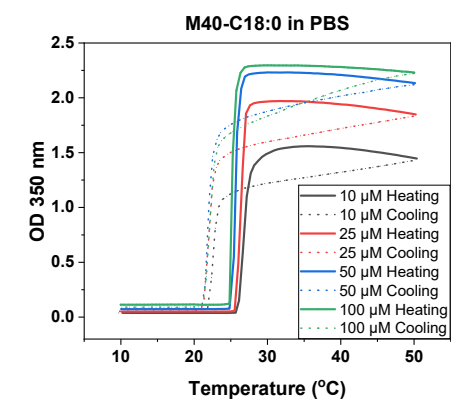

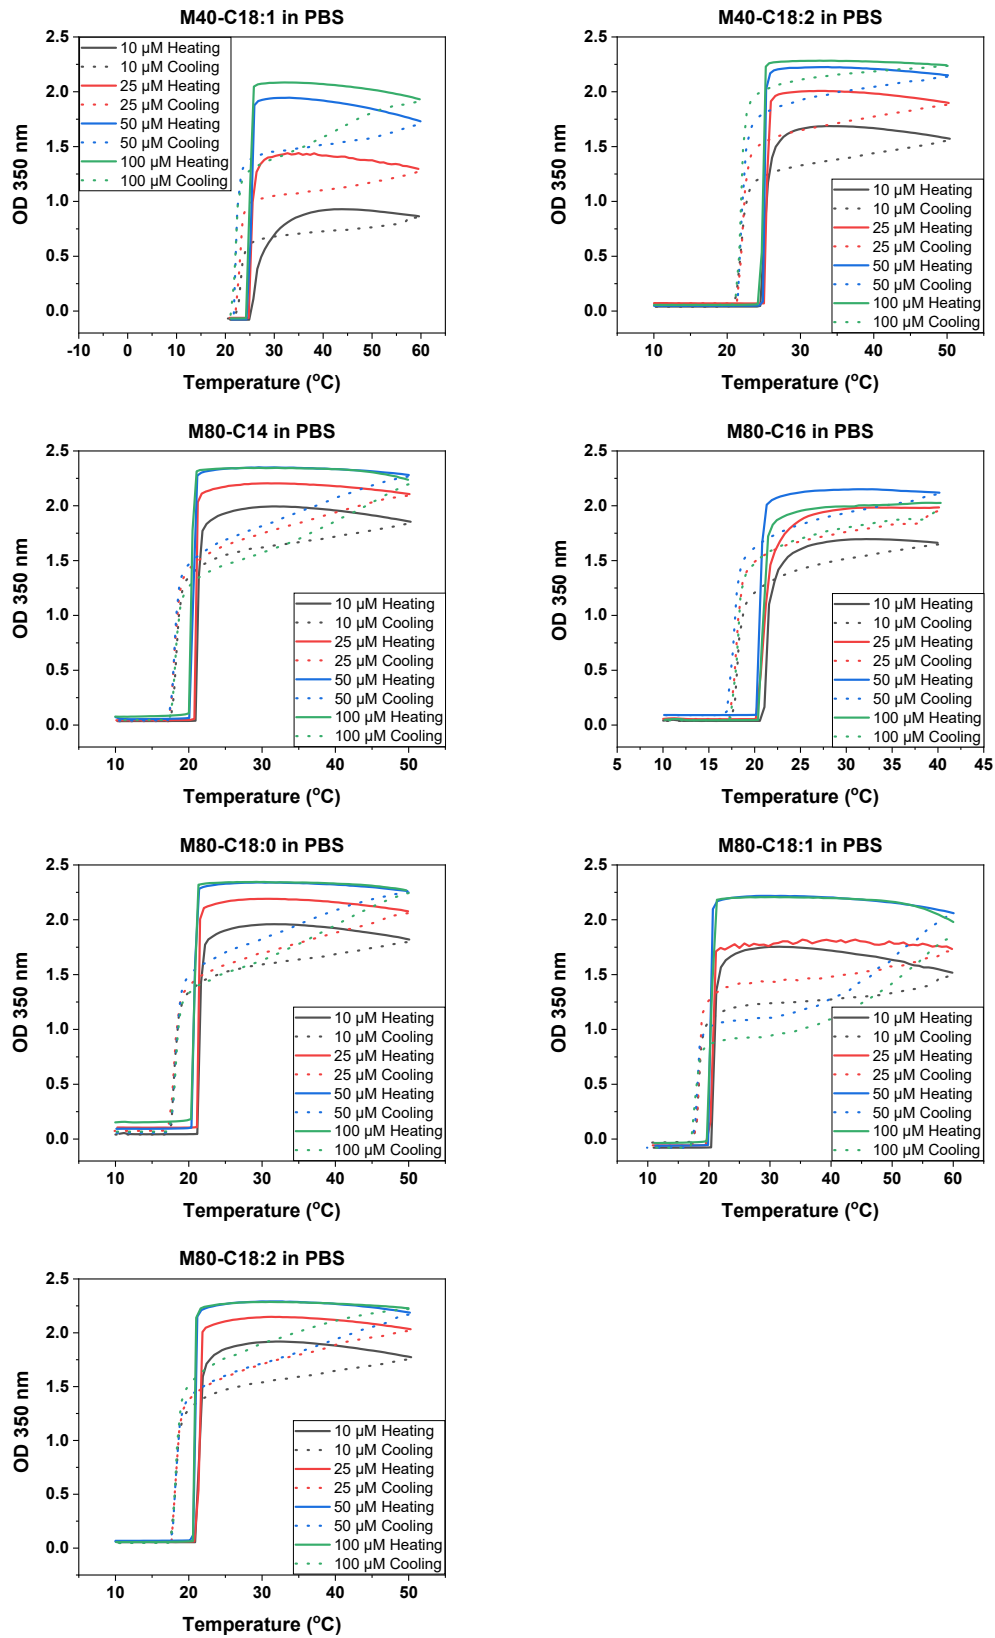

Figure S6. T-scans of the 15 ELP-FAs at various concentrations in PBS. Heating ramps

(plain lines) and cooling ramps (dashed lines) are given at various conjugate concentrations, from 10  $\mu\text{M}$  to 100  $\mu\text{M}$ . The absorbances of the solutions were recorded at 350 nm.

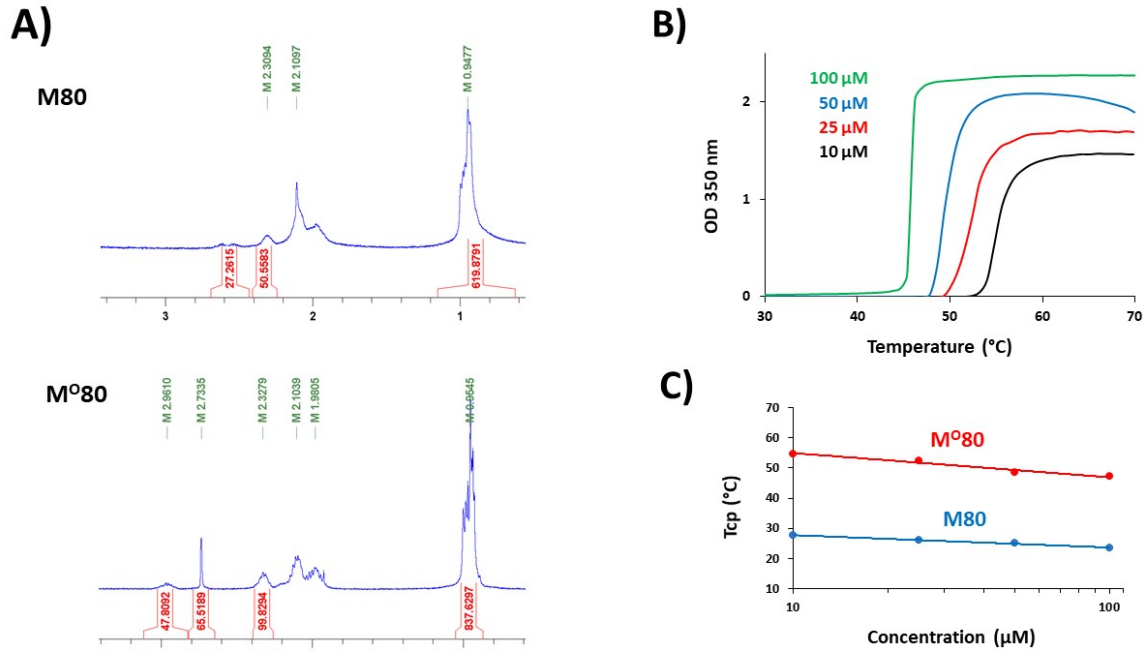

**Figure S7. Characterization of the oxidized M80.** A)  $^1\text{H}$  NMR analysis of M80 (Top) and M<sup>O</sup>80 (bottom). The apparition of a characteristic peak corresponding to the sulfoxide function can be detected at 2.73 ppm<sup>1</sup>. The integration of this peak indicates that 95% of the methionine were oxidized B) Turbidimetry experiments with different concentrations of M<sup>O</sup>80 in PBS buffer. C) Tcp values of M80 and M<sup>O</sup>80 as function of the ELP concentrations. Tcps values of M<sup>O</sup>80 are about twice as high as those of the M80.

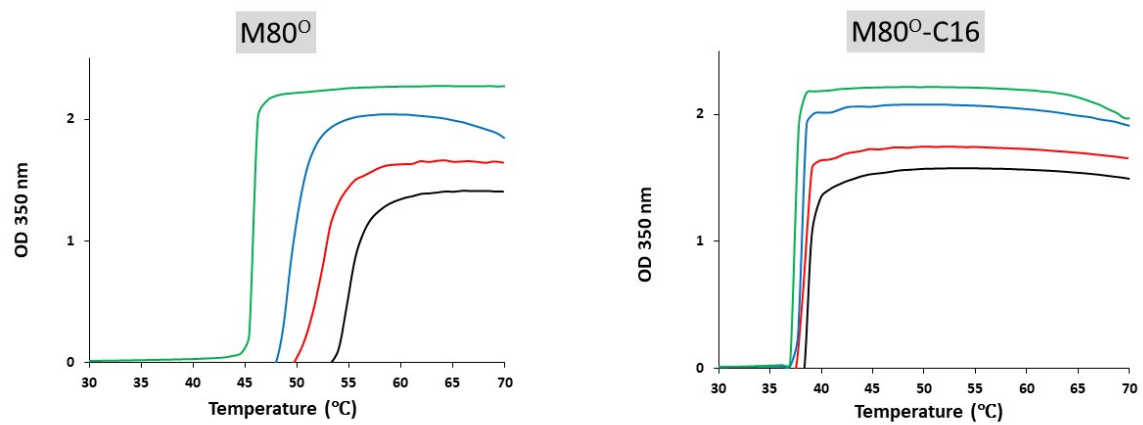

**Figure S8. T-scans of M<sup>0</sup>80 and M<sup>0</sup>80-C16 at various concentrations in PBS. Only the heating steps are plotted.**

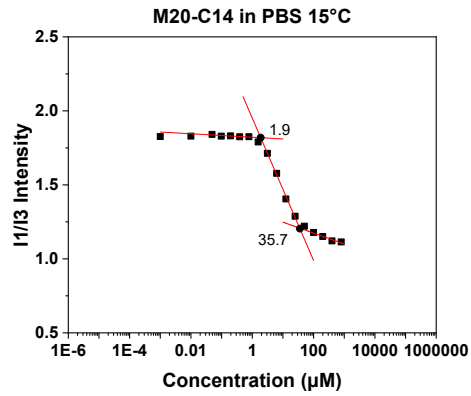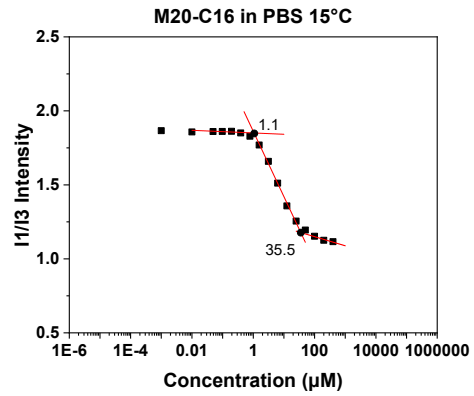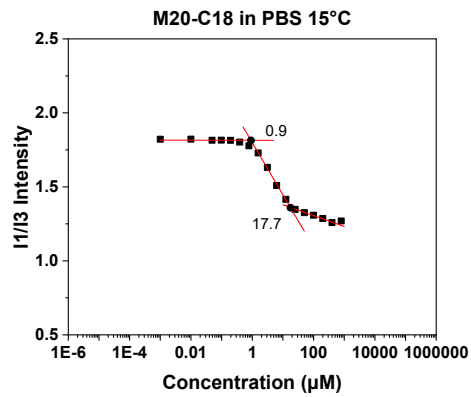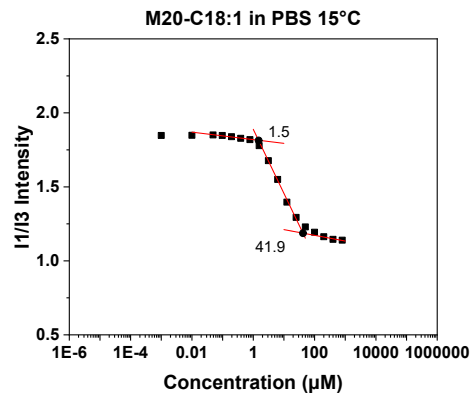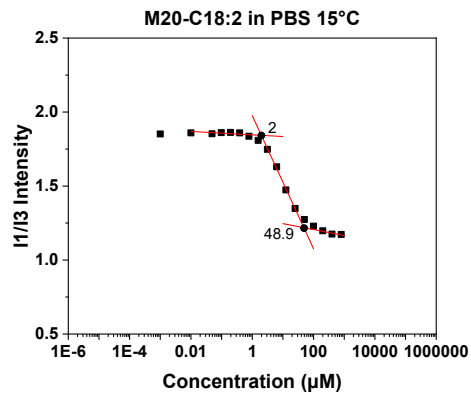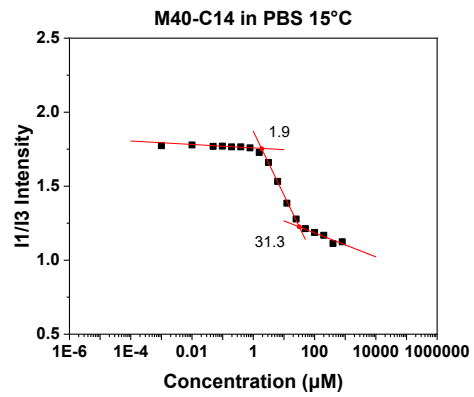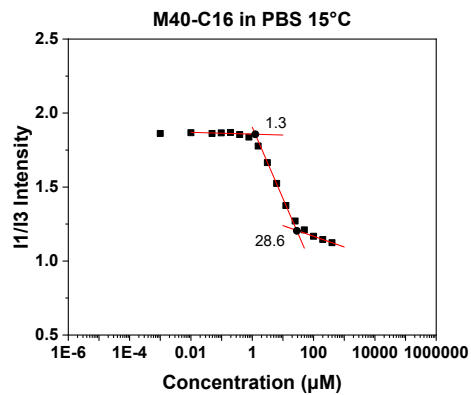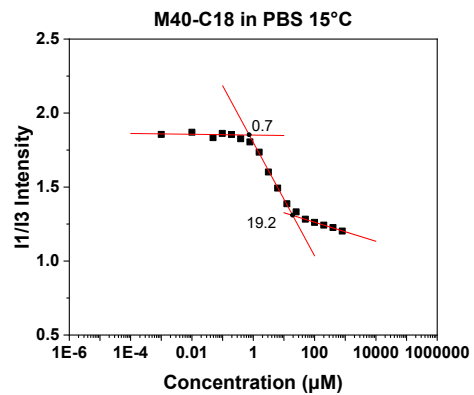



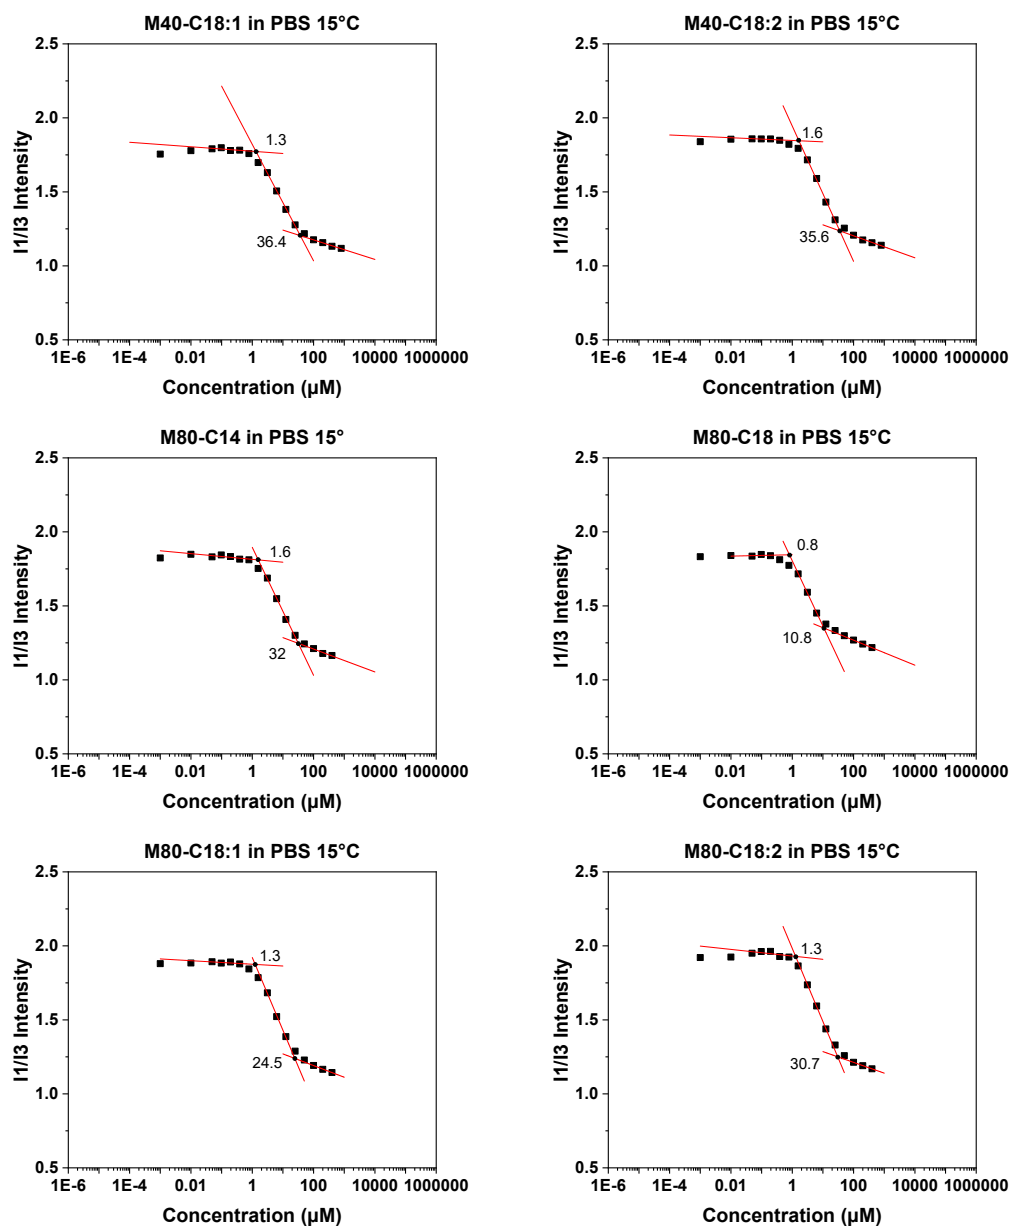

**Figure S9. Variation of the I1/I3 ratio for ELP-FAs in PBS at 15°C as function of the conjugate concentration.** The CMC values shown on the graphs correspond to the “low” and “high” CMC values (see Fig. 3.A).

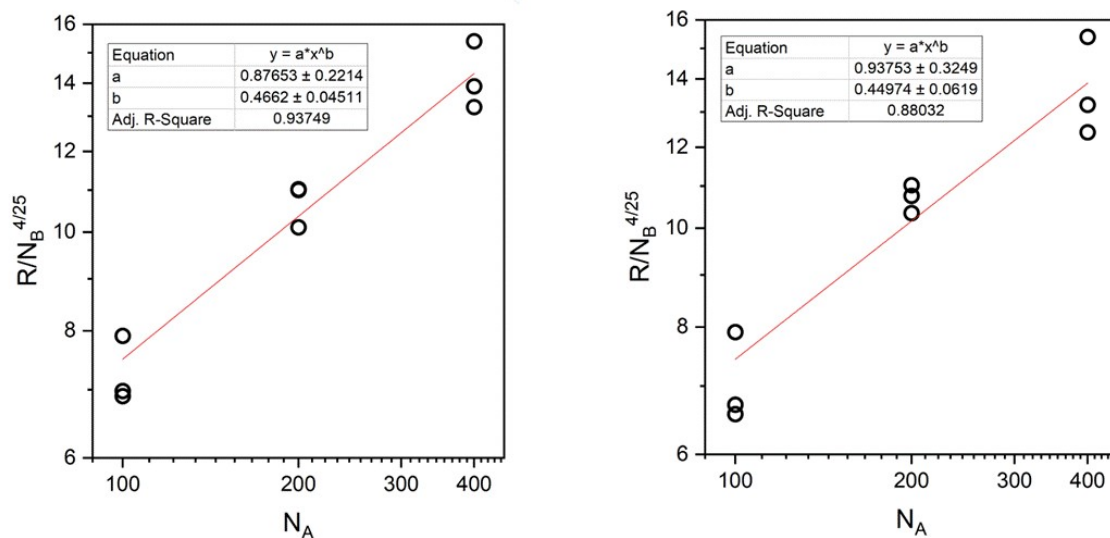

**Figure S10. Fitting analysis of ELP-FA micelles with a star model.** The micelle radii determined by the cumulant analysis of DLS data were fitted with a modified scaling law proposed by Halperin<sup>2</sup>,  $R \sim N_B^{4/25} N_A^b$  with  $N_B$  and  $N_A$  the degree polymerization of the FA and ELP blocks. *Left* : data obtained with C14, C16, C18; *Right* : data obtained with C18, C18:1, C18:2.

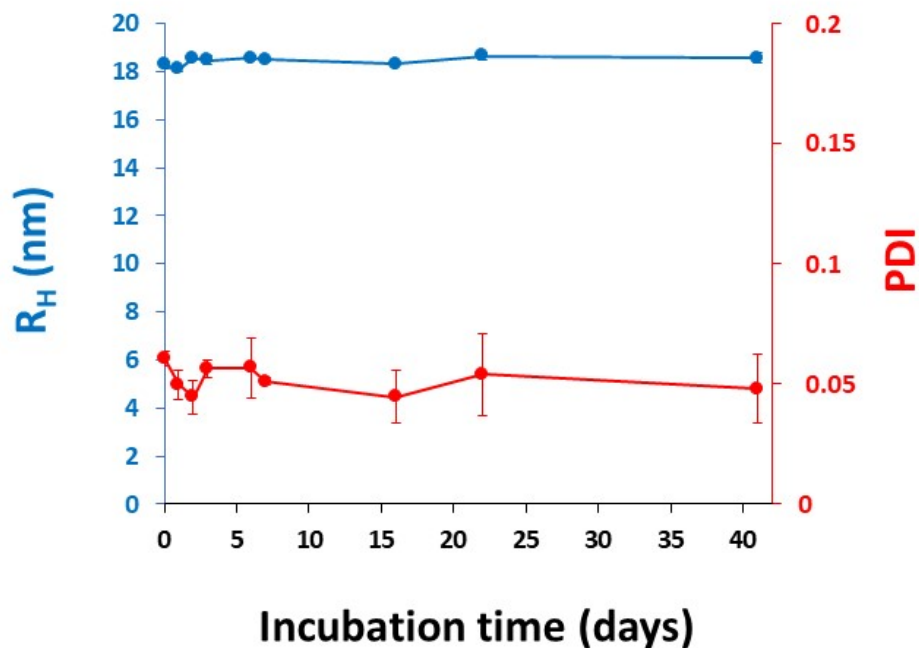

**Figure S11. Stability of M80-C16 nanoparticles upon storage at 4°C in PBS buffer.** M80-C16 was solubilized into PBS at a concentration of 5 mg mL<sup>-1</sup> (147 μM). The sample was stored at 4 °C, and  $R_H$  (nm) and PDI were recorded at 15 °C. For each value, data are mean of three measures ± SD.

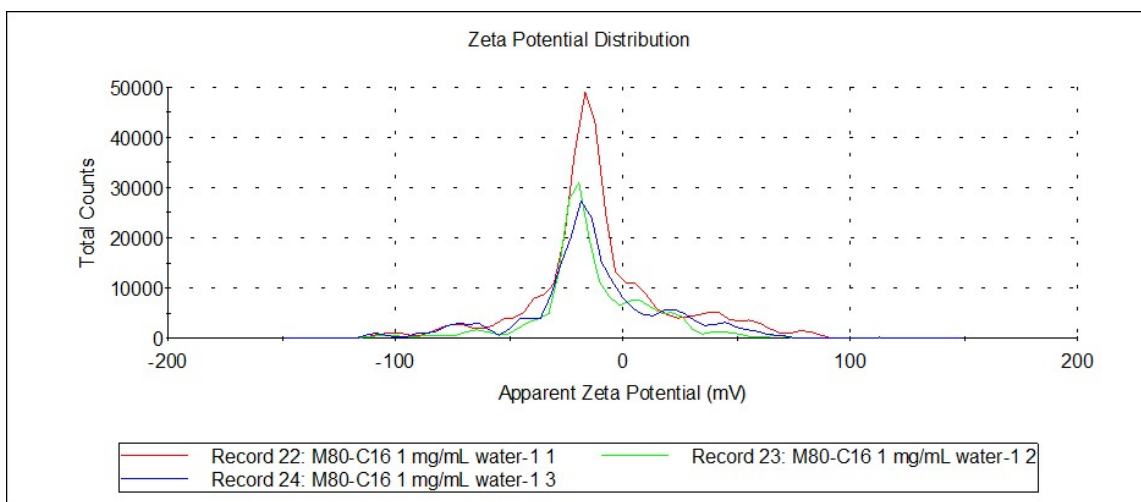

**Figure S12. Zeta potential distribution of M80-C16 micelles in water at 1 mg mL<sup>-1</sup>.**

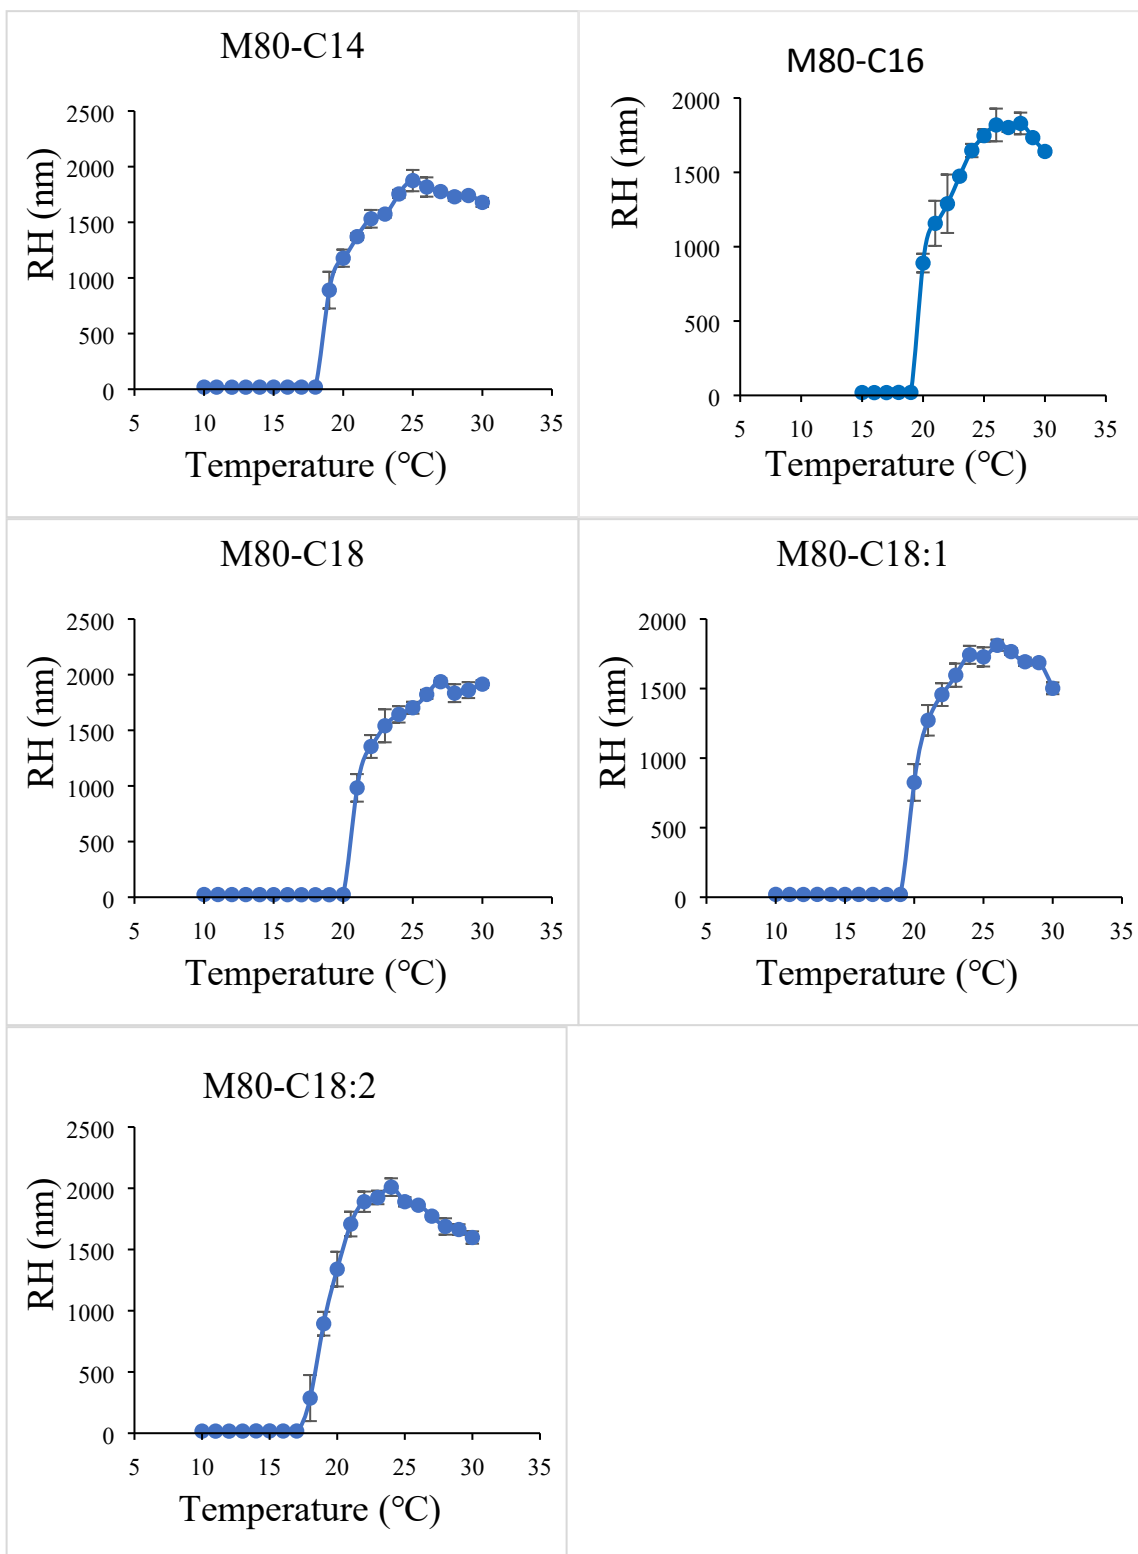

**Figure S13: Variation of the hydrodynamic radius of ELP-FA micelles during a temperature ramp.** Solutions of M80-C14, M80-C16, M80-C18, M80-C18:1 and M80-C18:2 at a concentration of 1 mg mL<sup>-1</sup> in PBS buffer were analyzed by DLS between 10 and 30 °C. For each value, data are mean of three measurements ± SD.

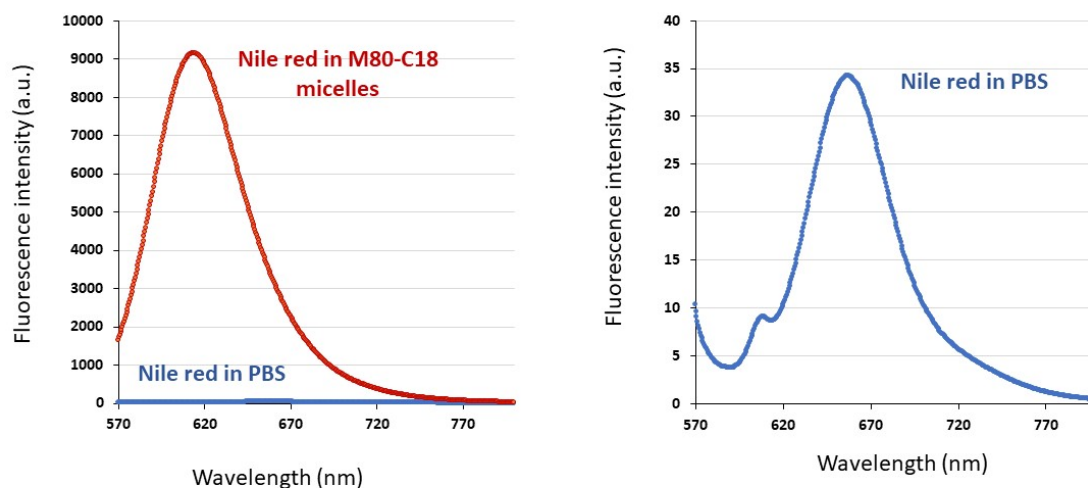

**Figure S14: Nile red fluorescence in PBS and after encapsulation in M80-C18 micelles.**

2  $\mu\text{l}$  of a 3 mM solution of Nile red in DMSO were mixed with either 600  $\mu\text{L}$  of PBS (blue traces) or 600  $\mu\text{L}$  of a solution of M80-C18 at 1  $\text{mg mL}^{-1}$  in PBS (red traces). The fluorescence of the two samples was recorded between 570 nm and 780 nm.

**Table S1. Gradient program used for analytical RP-HPLC**

**Buffer A: Water + 0.1% TFA**  
**Buffer B: Methanol + 0.1% TFA**

| Time (min) | % buffer A | % buffer B |
|------------|------------|------------|
| 0          | 100        | 0          |
| 3          | 100        | 0          |
| 35         | 0          | 100        |
| 45         | 0          | 100        |
| 46         | 100        | 0          |
| 55         | 100        | 0          |

**Table S2. Physico-chemical characteristics of the fatty acids used in the study.**

| Fatty acid | Common Name   | MW (g mole <sup>-1</sup> ) | Log P | Melting Point (°C) |
|------------|---------------|----------------------------|-------|--------------------|
| C14:0      | Myristic acid | 228.4                      | 6.11  | 53.9               |
| C16:0      | Palmitic acid | 256.4                      | 7.17  | 61.8               |
| C18:0      | Stearic acid  | 284.5                      | 8.23  | 68.8               |
| C18:1      | Oleic acid    | 282.5                      | 7.73  | 13.4               |
| C18:2      | Linoleic acid | 280.4                      | 7.05  | -8.5               |

**Table S3. Targeted ELP-FA conjugates.**

|     | C14             |                        | C16    |          | C18    |          | C18:1  |          | C18:2  |          |
|-----|-----------------|------------------------|--------|----------|--------|----------|--------|----------|--------|----------|
|     | <sup>a</sup> MW | MW <sup>b</sup> ELP:FA | MW     | ELP:FA   | MW     | ELP:FA   | MW     | ELP:FA   | MW     | ELP:FA   |
| M20 | 8 687           | 8 897 38.1 :1          | 8 925  | 33.9 :1  | 8 953  | 30.5 :1  | 8 951  | 30.8 :1  | 8 949  | 31.0 :1  |
| M40 | 17 035          | 17 245 74.7 :1         | 17 274 | 66.5 :1  | 17 301 | 59.9 :1  | 17 300 | 60.4 :1  | 17 298 | 60.8 :1  |
| M80 | 33 735          | 33 945 148.0 :1        | 33 974 | 131.8 :1 | 34 002 | 118.8 :1 | 34 000 | 119.6 :1 | 33 998 | 120.5 :1 |

<sup>a</sup>theoretical molecular weight in g mole<sup>-1</sup>. Data for ELP were obtained from ProtParam<sup>3</sup>.

<sup>b</sup>ELP/FA: mass ratio

**Table S4. RP-HPLC analysis of ELP-FAs**

|     |                             | ELP  | ELP-C14 | ELP-C16 | ELP-C18 | ELP-C18:1 | ELP-C18:2 |
|-----|-----------------------------|------|---------|---------|---------|-----------|-----------|
| M20 | <sup>a</sup> Retention time | 32.7 | 35.9    | 36.4    | 36.9    | 36.5      | 36.2      |
|     | <sup>b</sup> Purity (%)     |      | 99      | 99      | 99      | 99        | 99        |
| M40 | Retention time              | 35.3 | 37.9    | 38.4    | 38.9    | 38.5      | 38.1      |
|     | Purity (%)                  |      | 96      | 99      | 98      | 98        | 96        |
| M80 | Retention time              | 35.9 | 37.7    | 38.2    | 38.7    | 38.3      | 37.9      |
|     | Purity (%)                  |      | 96      | 97      | 97      | 98        | 96        |

tion times in min.

<sup>b</sup>purity was determined from the peak area of ELP-FA relative to the total peak area on the same chromatogram

<sup>a</sup>reten

**Table S5. Molecular weight of ELP and ELP-FAs samples measured by ESI-MS**

| <b>ELP and ELP-FA</b> | <b>Theoretical MW<br/>(g mole<sup>-1</sup>)</b> | <b>Expérimental MW<br/>(g mole<sup>-1</sup>)</b> |
|-----------------------|-------------------------------------------------|--------------------------------------------------|
| <b>M20</b>            | <b>8 687</b>                                    | <b>8 686</b>                                     |
| <b>M20-C14</b>        | <b>8 897</b>                                    | <b>8 896</b>                                     |
| <b>M20-C16</b>        | <b>8 925</b>                                    | <b>8 924</b>                                     |
| <b>M20-C18</b>        | <b>8 953</b>                                    | <b>8 952</b>                                     |
| <b>M20-C18:1</b>      | <b>8 951</b>                                    | <b>8 950</b>                                     |
| <b>M20-C18:2</b>      | <b>8 949</b>                                    | <b>8 948</b>                                     |
| <b>M40</b>            | <b>17 035</b>                                   | <b>17 037</b>                                    |
| <b>M40-C14</b>        | <b>17 246</b>                                   | <b>17 246</b>                                    |
| <b>M40-C16</b>        | <b>17 274</b>                                   | <b>17 274</b>                                    |
| <b>M40-C18</b>        | <b>17 302</b>                                   | <b>17 302</b>                                    |
| <b>M40-C18:1</b>      | <b>17 300</b>                                   | <b>17 300</b>                                    |
| <b>M40-C18:2</b>      | <b>17 298</b>                                   | <b>17 298</b>                                    |
| <b>M80</b>            | <b>33 736</b>                                   | <b>33 739</b>                                    |
| <b>M80-C14</b>        | <b>33 946</b>                                   | <b>33 946</b>                                    |
| <b>M80-C16</b>        | <b>33 974</b>                                   | <b>33 973</b>                                    |
| <b>M80-C18</b>        | <b>34 002</b>                                   | <b>34 002</b>                                    |
| <b>M80-C18:1</b>      | <b>34 000</b>                                   | <b>34 000</b>                                    |
| <b>M80-C18:2</b>      | <b>33 998</b>                                   | <b>33 998</b>                                    |

**Table S6. T<sub>cp</sub> values (in °C) of ELP-FA conjugates at different concentrations in PBS.**

|            | concentrations | C14  | C16  | C18  | C18:1 | C18:2 |
|------------|----------------|------|------|------|-------|-------|
| <b>M20</b> | 100 μM         | 33.2 | 34.4 | 36.8 | 34.2  | 34.8  |
|            | 50 μM          | 33.9 | 34.5 | 37.5 | 34.9  | 34.8  |
|            | 25 μM          | 34.0 | 35.2 | 38.1 | 35.0  | 35.2  |
|            | 10 μM          | 34.6 | 35.8 | 38.8 | 33.5  | 36.1  |
| <b>M40</b> | 100 μM         | 24.2 | 23.9 | 24.8 | 24.2  | 24.7  |
|            | 50 μM          | 24.4 | 24.6 | 25.4 | 25.1  | 24.9  |
|            | 25 μM          | 25.0 | 24.4 | 26.0 | 24.8  | 25.0  |
|            | 10 μM          | 25.1 | 25.0 | 27.7 | 26.5  | 24.5  |
| <b>M80</b> | 100 μM         | 20.0 | 20.4 | 20.3 | 19.7  | 20.5  |
|            | 50 μM          | 20.1 | 20.2 | 20.4 | 19.9  | 20.6  |
|            | 25 μM          | 20.8 | 20.7 | 21.1 | 20.3  | 20.8  |
|            | 10 μM          | 20.9 | 21.1 | 21.2 | 20.4  | 20.9  |

**Table S7. High (H) and low (L) CMC values (in μM) in PBS at 15 °C for the 15 ELP-FAs studied.**

|            | <b>C14</b> |    | <b>C16</b> |    | <b>C18</b> |    | <b>C18:1</b> |    | <b>C18:2</b> |    |
|------------|------------|----|------------|----|------------|----|--------------|----|--------------|----|
|            | L          | H  | L          | H  | L          | H  | L            | H  | L            | H  |
| <b>M20</b> | 1.9        | 36 | 1.1        | 36 | 0.9        | 18 | 1.5          | 42 | 2.0          | 49 |
| <b>M40</b> | 1.9        | 31 | 1.3        | 29 | 0.7        | 19 | 1.3          | 36 | 1.6          | 36 |
| <b>M80</b> | 1.6        | 32 | 0.9        | 26 | 0.8        | 11 | 1.3          | 24 | 1.3          | 30 |



**Table S8.  $R_H$  (nm) and PDI values of ELP-FA micelles in PBS measured by DLS at 15 °C**

|                |       | ELP-C14 | ELP-C16 | ELP-C18 | ELP-C18:1 | ELP-C18:2 |
|----------------|-------|---------|---------|---------|-----------|-----------|
| M20-fatty acid | $R_H$ | 9       | 9       | 11      | 9         | 9         |
|                | PDI   | 0.029   | 0.030   | 0.022   | 0.054     | 0.018     |
| M40-fatty acid | $R_H$ | 13      | 14      | 15      | 14        | 14        |
|                | PDI   | 0.104   | 0.188   | 0.012   | 0.134     | 0.172     |
| M80-fatty acid | $R_H$ | 17      | 18      | 21      | 18        | 17        |
|                | PDI   | 0.074   | 0.116   | 0.075   | 0.080     | 0.046     |

**Table S9. Values of the rate constant (k), release exponent (n), and correlation coefficient ( $R^2$ ) determined from the the Korsmeyer-Peppas equation ( $Q_t/Q_\infty = kt^n$ ) for M80-FA micelles.**

|         | k    | n    | $R^2$ |
|---------|------|------|-------|
| M80-C14 | 1.52 | 0.74 | 0.998 |
| M80-C16 | 2.18 | 0.64 | 0.999 |
| M80-C18 | 0.45 | 0.79 | 0.998 |

## Bibliography

- 1 R. Petitdemange, E. Garanger, L. Bataille, W. Dieryck, K. Bathany, B. Garbay, T. J. Deming and S. Lecommandoux, *Biomacromolecules*, 2017, **18**, 544–550.
- 2 A. Halperin, *Macromolecules*, 1987, **20**, 2943–2946.
- 3 E. Gasteiger, C. Hoogland, A. Gattiker, S. Duvaud, M. R. Wilkins, R. D. Appel and A. Bairoch, *The Proteomics Protocols Handbook*, 2005, **112**, 571–607.
